# Supplementary material for: Characterizing the genetic diversity of the Andean blueberry (Vaccinium floribundum Kunth.) across the Ecuadorian Highlands
Source: PubMed Central journal article supplement (PMC7721170; doi:10.1371/journal.pone.0243420), 2020-12-07
Supplement: pone.0243420.s001.pdf [file pone.0243420.s001.pdf]

**S1 Table. Information for the 27 *V. floribundum* collection sites (CS) from 3 defined regions in the Ecuadorian Highlands.**

| <b>Region</b> | <b>Collection site</b> | <b>Location</b> | <b>Province</b> | <b>Number of individuals</b> | <b>Elevation</b> |
|---------------|------------------------|-----------------|-----------------|------------------------------|------------------|
| Northern      | CS1                    | La Cofradia     | Carchi          | 3                            | 3243-3260        |
|               | CS2                    | San Gabriel     | Carchi          | 3                            | 3405-3489        |
|               | CS3                    | El Angel        | Carchi          | 4                            | 3317-3402        |
|               | CS4                    | Cahuasquí       | Imbabura        | 4                            | 3588-3714        |
|               | CS5                    | Cuicocha        | Imbabura        | 4                            | 3080-3122        |
|               | CS6                    | Santa Lucía     | Imbabura        | 3                            | 2994-3062        |
|               | CS7                    | Mojanda         | Pichincha       | 4                            | 3596-3958        |
|               | CS8                    | Cayambe         | Pichincha       | 3                            | 3721-3885        |
|               | CS9                    | Lloa            | Pichincha       | 4                            | 3450-3546        |
|               | CS10                   | PNC             | Cotopaxi        | 4                            | 3550-3803        |
|               | CS11                   | Sigchos         | Cotopaxi        | 3                            | 3118-3147        |
| Central       | CS12                   | Quilotoa        | Cotopaxi        | 4                            | 4090-4131        |
|               | CS13                   | Tisandeo        | Tungurahua      | 5                            | 3542-3601        |
|               | CS14                   | Carihuairazo    | Tungurahua      | 5                            | 3627-3787        |
|               | CS15                   | Salinas Norte   | Bolivar         | 3                            | 4038-4062        |
|               | CS16                   | Salinas         | Bolivar         | 3                            | 3609-3670        |
|               | CS17                   | Cebapamba       | Bolivar         | 4                            | 3243-3285        |
|               | CS18                   | Quimiac         | Chimborazo      | 7                            | 3482-3758        |
|               | CS19                   | Cerro Abuga     | Cañar           | 3                            | 3029-3120        |
|               | CS20                   | Surimpalti      | Cañar           | 4                            | 3015-3066        |
| Southern      | CS21                   | San Miguel      | Cañar           | 3                            | 3044-3100        |
|               | CS22                   | Toreadora       | Azuay           | 4                            | 3929-3956        |
|               | CS23                   | Cajas           | Azuay           | 3                            | 4057-4098        |
|               | CS24                   | Cruces          | Azuay           | 3                            | 4154-4160        |
|               | CS25                   | Saraguro        | Loja            | 3                            | 2881-3008        |
|               | CS26                   | Santiago        | Loja            | 3                            | 2868-2911        |
|               | CS27                   | Podocarpus      | Loja            | 4                            | 3039-3067        |
