# Supplementary material for: Characterizing the genetic diversity of the Andean blueberry (Vaccinium floribundum Kunth.) across the Ecuadorian Highlands
Source: PubMed Central journal article supplement (PMC7721170; doi:10.1371/journal.pone.0243420), 2020-12-07
Supplement: pone.0243420.s002.pdf [file pone.0243420.s002.pdf]

**S2 Table. List of the 30 species-specific SSR markers designed for *V. floribundum***

| Locus         | Primer sequences (5'-3')                                                    | Motif             | T °C      |
|---------------|-----------------------------------------------------------------------------|-------------------|-----------|
| <b>Mo001*</b> | <b>F: AACCTGTACAAGTCTACCCCTACCG</b><br><b>R: TAATAACAGAACATCAGTGCAAGGC</b>  | <b>(TTCCTG)48</b> | <b>58</b> |
| <b>Mo002</b>  | <b>F: CAAAATAACCCTCAAACACACACC</b><br><b>R: TTTATCATTATCCTACAGCGTCACC</b>   | <b>(TTTGG)50</b>  | <b>58</b> |
| Mo003         | F: CTACCCATCCAACCACCTAACC<br>R: TAATAACAGAACATCAGTGCAAGGC                   | (ATGG)36          | 58        |
| <b>Mo004</b>  | <b>F: GAGGTATTGGAATCCTTGGATGG</b><br><b>R: CTCTCCCTCAACTCTTCCC</b>          | <b>(TCC)33</b>    | <b>58</b> |
| <b>Mo005</b>  | <b>F: TAGAGATTCATCTCCATCCTTTTGC</b><br><b>R: GTCCATTAGGGTTCCAAAAGTGC</b>    | <b>(ACC)33</b>    | <b>58</b> |
| Mo006         | F: GTTTGAAGATCTCGTGAGTAGG<br>R: CAGTAGAACCCTTACCCCTGTAGC                    | (ACC)27           | 63        |
| <b>Mo007</b>  | <b>F: GAAGCCTGGTCAGTCCTTTCC</b><br><b>R: CACTAGGAGTCTGACTTTCCTCTGC</b>      | <b>(TGC)24</b>    | <b>63</b> |
| <b>Mo008</b>  | <b>F: ACTACCCTGCCACTCTCACTACC</b><br><b>R: CGGACCCAGAGTTAGGATAATACC</b>     | <b>(ACC)27</b>    | <b>63</b> |
| <b>Mo009</b>  | <b>F: TATTCTTATGTTTCGTCCTCGTAGGC</b><br><b>R: TTTCTGCTAGCTGTTGTTGTAACG</b>  | <b>(AGT)24</b>    | <b>63</b> |
| <b>Mo010</b>  | <b>F: TAGACAACCACTTTCTTTGGTTTCC</b><br><b>R: AATAAGTCTTGCTTTGTACCTTGCC</b>  | <b>(TTC)30</b>    | <b>63</b> |
| <b>Mo011</b>  | <b>F: GCGAGAGTATTGGTGTTTCATGC</b><br><b>R: CAGGTATAGATATACTGGGTTTGGAGG</b>  | <b>(TTC)24</b>    | <b>58</b> |
| Mo012         | F: TGTTACGCTTATTACGTTGTGTTGG<br>R: TTCACAGTTGACTTGTCTTATGCC                 | (ACC)24           | 60        |
| Mo013         | F: AGAGTACCATTTGGGTTAGTTTTCG<br>R: GACCAAAACAGTAGAAAACGACAGC                | (TTC)33           | 60        |
| Mo014         | F: CTTTAAATGGAACCCCTCTTGTAGG<br>R: AATACATACAATCTCAGGCAAAGGG                | (ATT)30           | 60        |
| <b>Mo015</b>  | <b>F: TAAATCCAAAAGGACAACCTCCATCC</b><br><b>R: AACATGGGTTTAGCGTAGGAGACG</b>  | <b>(TTC)27</b>    | <b>60</b> |
| <b>Mo016</b>  | <b>F: GAAGAAGAAATGGTGAGACAACCTGC</b><br><b>R: AAGAAGATTGACTAGGGAGACATCG</b> | <b>(TTC)33</b>    | <b>60</b> |
| Mo017         | F: AAAACGTAGTTGGACAAACGATACG<br>R: GGTGGTTGTGGCCAAAATAGG                    | (ATT)42           | 60        |
| <b>Mo018</b>  | <b>F: ATTCGGGTATGGAGAGAGAAAAGAGG</b><br><b>R: ACACCAACAAAACCCGAAAATAACC</b> | <b>(TCC)27</b>    | <b>60</b> |
| Mo019         | F: AACCTGTGTAATCTCACCCACTACC<br>R: ATAGATGAGGTGCAACAAGAGTTGG                | (AAC)33           | 58        |
| <b>Mo020</b>  | <b>F: CTACATTTTACCCGGTCACTTTTGC</b><br><b>R: CACTAGTTACAAGAGCATTTTCCC</b>   | <b>(ATT)33</b>    | <b>60</b> |
| <b>Mo021</b>  | <b>F: CATGGTTTGGTCTAGTTGATAACCC</b><br><b>R: GATGCTTCTAGAGCCTTTATTGC</b>    | <b>(TTC)33</b>    | <b>60</b> |
| Mo022         | F: CTTTAGAAACACGAAGTGACAGACC<br>R: TAGCTAATAGGTCAAGGGTTCAAGG                | (TTC)30           | 60        |
| Mo023         | F: GACGACCAGAATAAAGAAGAGAAAGG<br>R: CTGAAGCCGACATATAGAACTTGG                | (ATT)24           | 60        |
| <b>Mo024</b>  | <b>F: TGTGCTTCTTTTGTTCCTACCC</b><br><b>R: TTAGAGTTCTAAGCCAACAACTCG</b>      | <b>(ATC)24</b>    | <b>60</b> |
| <b>Mo025</b>  | <b>F: GGTCAAAAGGAGGAGAATAATAGCC</b><br><b>R: TGCTCTGCCCATTTAATGTTACC</b>    | <b>(TTC)54</b>    | <b>60</b> |
| Mo026         | F: AAGGGGCATCACTGTAATAGTATCG<br>R: GAACGAAATCATCGTCTTACG                    | (TC)30            | 60        |
| Mo027         | F: CTTACCATGGTTGTAGCATTTTCCC<br>R: GTCCGTCAATTGTTTATGGATAAGG                | (AT)20            | 60        |
| Mo028         | F: TGCTTTCATCTATTGACCTTATCGG<br>R: GGGTGTCTGATCAGTAATCTCTCG                 | (AC)18            | 60        |
| Mo029         | F: ACACCCTCAACTCAATACAGTGTGC<br>R: TGATGAGAATCCACCATTTTAGTGC                | (TC)30            | 60        |
| Mo030         | F: TAGACAACCAAGCTCATTGTATCG<br>R: CACTTAGAACAGGAACCTCACCTGC                 | (TC)18            | 60        |

\* The 16 SSR markers used to genotype the Ecuadorian *V. floribundum* individuals are in bold type.
