# Supplementary material for: Characterizing the genetic diversity of the Andean blueberry (Vaccinium floribundum Kunth.) across the Ecuadorian Highlands
Source: PubMed Central journal article supplement (PMC7721170; doi:10.1371/journal.pone.0243420), 2020-12-07
Supplement: pone.0243420.s003.pdf [file pone.0243420.s003.pdf]

**S3 Table. Estimate of null allele frequencies for each analyzed *V. floribundum* genetic cluster and SSR locus.**

| <b>Locus</b> | <b>Cluster 1</b> | <b>Cluster 2</b> | <b>Cluster 3</b> | <b>Cluster 4</b> | <b>Mean</b> |
|--------------|------------------|------------------|------------------|------------------|-------------|
| <b>Mo001</b> | 0.089            | 0.131            | 0.088            | 0.091            | 0.100       |
| <b>Mo002</b> | 0.000            | 0.039            | 0.016            | 0.081            | 0.034       |
| <b>Mo004</b> | 0.275            | 0.215            | 0.017            | 0.117            | 0.156       |
| <b>Mo005</b> | 0.320            | 0.194            | 0.086            | 0.068            | 0.167       |
| <b>Mo007</b> | 0.224            | 0.142            | 0.052            | 0.048            | 0.117       |
| <b>Mo008</b> | 0.001            | 0.065            | 0.113            | 0.129            | 0.077       |
| <b>Mo009</b> | 0.352            | 0.174            | 0.215            | 0.106            | 0.211       |
| <b>Mo010</b> | 0.236            | 0.139            | 0.129            | 0.121            | 0.156       |
| <b>Mo011</b> | 0.001            | 0.126            | 0.048            | 0.000            | 0.044       |
| <b>Mo015</b> | 0.001            | 0.216            | 0.077            | 0.297            | 0.148       |
| <b>Mo016</b> | 0.342            | 0.160            | 0.171            | 0.000            | 0.168       |
| <b>Mo018</b> | 0.261            | 0.145            | 0.198            | 0.174            | 0.195       |
| <b>Mo020</b> | 0.176            | 0.150            | 0.104            | 0.224            | 0.163       |
| <b>Mo021</b> | 0.369            | 0.120            | 0.162            | 0.069            | 0.180       |
| <b>Mo024</b> | 0.330            | 0.089            | 0.091            | 0.082            | 0.148       |
| <b>Mo025</b> | 0.453            | 0.178            | 0.214            | 0.055            | 0.225       |

Mean: the mean frequencies over the four genetic clusters.
