# Supplementary material for: Characterizing the genetic diversity of the Andean blueberry (Vaccinium floribundum Kunth.) across the Ecuadorian Highlands
Source: PubMed Central journal article supplement (PMC7721170; doi:10.1371/journal.pone.0243420), 2020-12-07
Supplement: pone.0243420.s004.pdf [file pone.0243420.s004.pdf]

**S4 Table. Summary of the diversity parameters for each collection site where *V. floribundum* individuals were collected.**

| Collection site | N <sub>A</sub> | N <sub>PA</sub> | A <sub>R</sub> | H <sub>O</sub> | H <sub>E</sub> | F <sub>IS</sub> |
|-----------------|----------------|-----------------|----------------|----------------|----------------|-----------------|
| CS1             | 43             | -               | 2.31           | 0.54           | 0.48           | 0.03            |
| CS2             | 45             | 2               | 2.28           | 0.54           | 0.52           | 0.12            |
| CS3             | 49             | -               | 2.25           | 0.53           | 0.53           | 0.12            |
| CS4             | 40             | 4               | 2.04           | 0.47           | 0.5            | 0.07            |
| CS5             | 40             | 1               | 2.02           | 0.55           | 0.5            | -0.05           |
| CS6             | 36             | 1               | 1.83           | 0.46           | 0.42           | 0.11            |
| CS7             | 42             | 3               | 1.97           | 0.34           | 0.46           | 0.33            |
| CS8             | 28             | 2               | 1.31           | 0.14           | 0.21           | 0.4             |
| CS9             | 29             | 1               | 1.37           | 0.23           | 0.27           | 0.19            |
| CS10            | 42             | 2               | 2.05           | 0.42           | 0.46           | 0.15            |
| CS11            | 37             | -               | 1.78           | 0.35           | 0.38           | 0.14            |
| CS12            | 26             | 1               | 1.23           | 0.07           | 0.21           | 0.78            |
| CS13            | 53             | 5               | 2.15           | 0.46           | 0.5            | 0.2             |
| CS14            | 60             | 6               | 2.54           | 0.58           | 0.6            | 0.17            |
| CS15            | 42             | 1               | 2.16           | 0.46           | 0.42           | 0.08            |
| CS16            | 42             | 1               | 2.23           | 0.58           | 0.49           | -0.07           |
| CS17            | 45             | -               | 2.1            | 0.5            | 0.47           | -0.01           |
| CS18            | 65             | 5               | 2.49           | 0.55           | 0.6            | 0.1             |
| CS19            | 39             | 1               | 1.99           | 0.52           | 0.46           | -0.04           |
| CS20            | 51             | -               | 2.33           | 0.36           | 0.53           | 0.44            |
| CS21            | 45             | 1               | 2.33           | 0.48           | 0.5            | 0.19            |
| CS22            | 34             | 2               | 1.65           | 0.09           | 0.36           | 0.82            |
| CS23            | 26             | 1               | 1.42           | 0.1            | 0.24           | 0.58            |
| CS24            | 28             | 3               | 1.5            | 0.06           | 0.28           | 0.76            |
| CS25            | 41             | 1               | 2.03           | 0.52           | 0.48           | 0.06            |
| CS26            | 48             | 5               | 2.49           | 0.56           | 0.52           | 0.09            |
| CS27            | 51             | 4               | 2.25           | 0.61           | 0.54           | -0.02           |

N<sub>A</sub> (number of alleles); N<sub>PA</sub> (number of private alleles); A<sub>R</sub> (mean allelic richness calculated using rarefaction); H<sub>O</sub> (observed heterozygosity); H<sub>E</sub> (expected heterozygosity); and F<sub>IS</sub> (fixation index) are given for all 100 individuals genotyped at 16 SSR loci across 27 collection sites in three geographic regions.
