# Supplementary material for: Characterizing the genetic diversity of the Andean blueberry (Vaccinium floribundum Kunth.) across the Ecuadorian Highlands
Source: PubMed Central journal article supplement (PMC7721170; doi:10.1371/journal.pone.0243420), 2020-12-07
Supplement: pone.0243420.s005.pdf [file pone.0243420.s005.pdf]

**S5 Table. Values for estimating the optimum K from the analysis in STRUCTURE with an admixture model.**

| <b>K</b> | <b>Reps</b> | <b>Mean LnP(K)</b> | <b>Stdev LnP(K)</b> | <b>Ln'(K)</b> | <b> Ln''(K) </b> | <b>Delta K</b> |
|----------|-------------|--------------------|---------------------|---------------|------------------|----------------|
| 3        | 10          | -4796.425          | 0.9500              | 283.750000    | 56.500000        | 59.473684      |
| 4        | 10          | -4569.1750         | 1.0595              | 227.250000    | 117.475000       | 110.879760     |
| 5        | 10          | -4459.4000         | 2.0510              | 109.775000    | 40.025000        | 19.514718      |
