# Supplementary material for: Characterizing the genetic diversity of the Andean blueberry (Vaccinium floribundum Kunth.) across the Ecuadorian Highlands
Source: PubMed Central journal article supplement (PMC7721170; doi:10.1371/journal.pone.0243420), 2020-12-07
Supplement: pone.0243420.s006.pdf [file pone.0243420.s006.pdf]

**S6 Table. Results of the analysis of molecular variance (AMOVA) performed for the *V. floribundum* genetic clusters that were identified in the population structure analysis ( $P=0.001$ ).**

| <b>Source</b>    | <b>Df</b> | <b>Sum Sq</b> | <b>Mean Sq</b> | <b>Est. Var.</b> | <b>%</b>    |
|------------------|-----------|---------------|----------------|------------------|-------------|
| Between clusters | 3         | 159.61        | 53.20          | 1.92             | 21.36%      |
| Within clusters  | 96        | 677.47        | 7.06           | 7.06             | 78.64%      |
| <b>Total</b>     | <b>99</b> | <b>837.08</b> |                | <b>8.98</b>      | <b>100%</b> |
