# Supplementary material for: Characterizing the genetic diversity of the Andean blueberry (Vaccinium floribundum Kunth.) across the Ecuadorian Highlands
Source: PubMed Central journal article supplement (PMC7721170; doi:10.1371/journal.pone.0243420), 2020-12-07
Supplement: pone.0243420.s007.pdf [file pone.0243420.s007.pdf]

**S7 Table. Output for general linear model for the effect of the elevation over the heterozygosity.**

| <b>Source</b> | <b>DF</b> | <b>Adj SS</b> | <b>Adj MS</b> | <b>F-Value</b> | <b>P-Value</b> |
|---------------|-----------|---------------|---------------|----------------|----------------|
| Elevation     | 1         | 0.090684      | 0.090684      | 9.74           | 0.005          |
| Error         | 25        | 0.232723      | 0.009309      |                |                |
| Lack-of-Fit   | 24        | 0.229523      | 0.009563      | 2.99           | 0.432          |
| Pure Error    | 1         | 0.003200      | 0.003200      |                |                |
| Total         | 26        | 0.323407      |               |                |                |
